# Supplementary material for: IL-27 signaling activates skin cells to induce innate antiviral proteins and protects against Zika virus infection
Source: PubMed Central journal article supplement — Sci Adv. 2020 Apr 1;6(14):eaay3245. doi: 10.1126/sciadv.aay3245 (PMC7112749; doi:10.1126/sciadv.aay3245), 2020-04-01
Supplement: aay3245_SM.pdf [file aay3245_SM.pdf]

## Supplementary Materials for

### **IL-27 signaling activates skin cells to induce innate antiviral proteins and protects against Zika virus infection**

Jeffery T. Kwock, Chelsea Handfield, Jutamas Suwanpradid, Peter Hoang, Michael J. McFadden, Kevin F. Labagnara, Lauren Floyd, Jessica Shannon, Ranjitha Uppala, Mrinal K. Sarkar, Johann E. Gudjonsson, David L. Corcoran, Helen M. Lazear, Gregory Sempowski, Stacy M. Horner, Amanda S. MacLeod\*

\*Corresponding author. Email: [amanda.macleod@duke.edu](mailto:amanda.macleod@duke.edu)

Published 1 April 2020, *Sci. Adv.* **6**, eaay3245 (2020)  
DOI: 10.1126/sciadv.aay3245

#### **This PDF file includes:**

Figs. S1 to S5  
Table S1

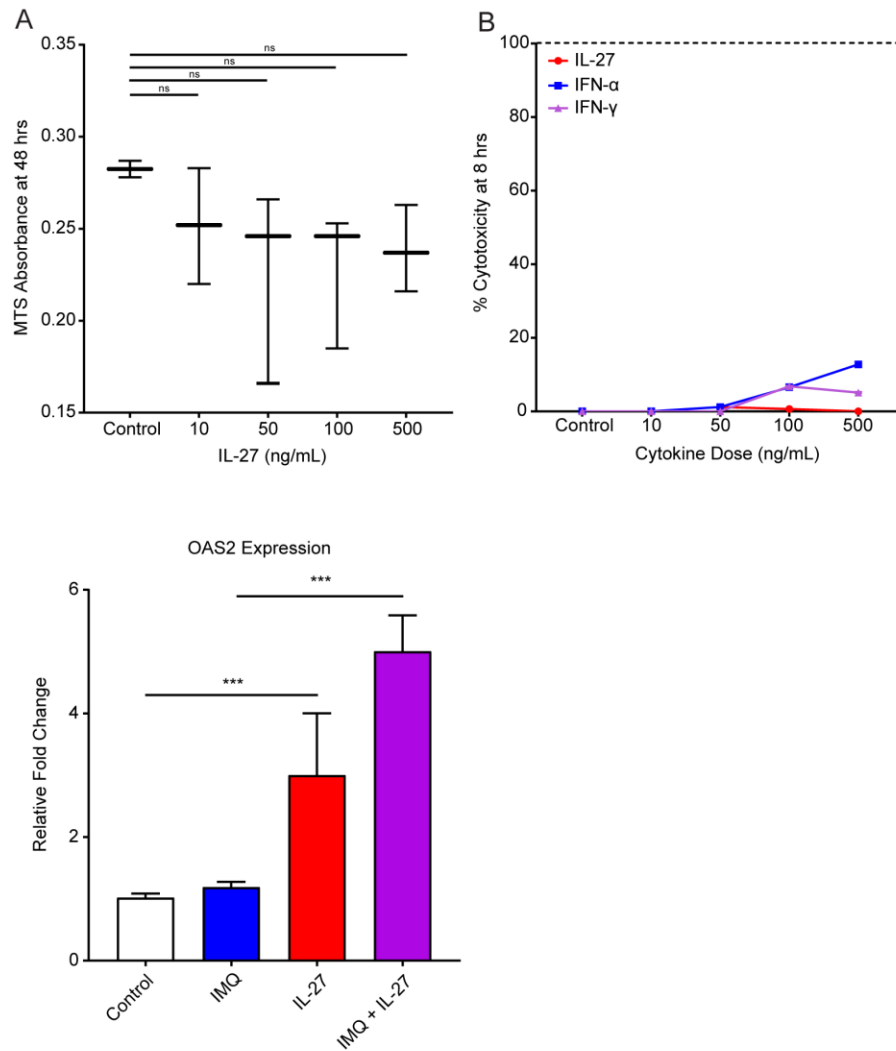

Supplementary Figure 1

### Supplementary Figure 1. IL-27 Treatment of Human Keratinocytes is not associated with Cytotoxicity

(A) MTS absorbance at 48 hours of human keratinocytes treated with IL-27 at the indicated concentrations. The MTS absorbance at each indicated concentration of IL-27 was compared to the non-treated control.  $n = 3$  biological replicates.

(B) % cytotoxicity measured as a percent of LDH absorbance in human keratinocytes treated with IL-27, IFN- $\alpha$ , and IFN- $\gamma$  at the indicated concentrations for 8 hours. The %

cytotoxicity at 8 hours for IL-27, IFN- $\alpha$ , and IFN- $\gamma$  was compared at each cytokine dose.  $n = 3$  biological replicates.

(C) qPCR analysis examining the expression of *OAS2* by primary human keratinocytes treated with IMQ and/or IL-27 (100ng/ml) for 24 hours. Relative fold change of *OAS2* for each condition was compared to the non-treated control.  $n = 3$  biological replicates. To test for statistical significance, a two-tailed Student's unpaired t test (A and C) was performed using GraphPad Prism software. Data are mean  $\pm$  SEM. \* $p < 0.05$ , \*\* $p < 0.01$ , \*\*\* $p < 0.001$ .

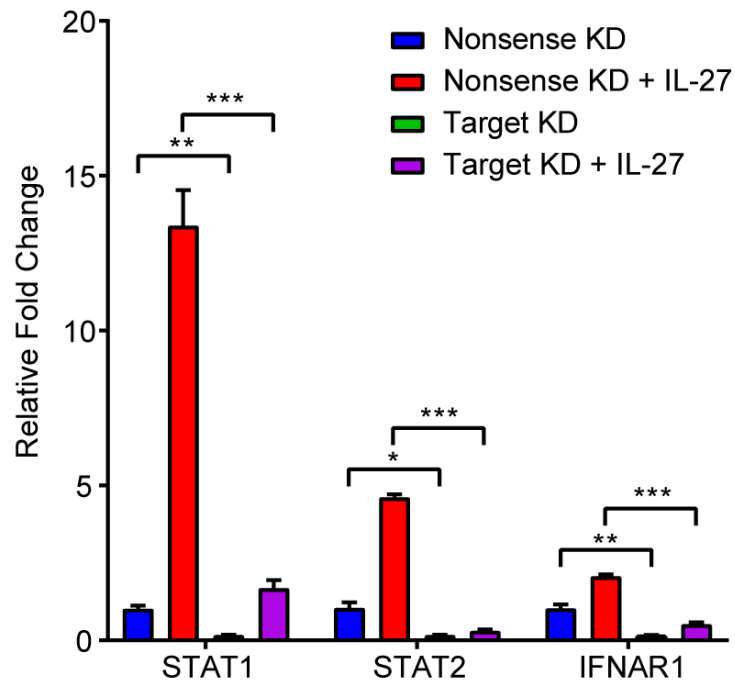

Supplementary Figure 2

### Supplementary Figure 2. Confirmation of Successful siRNA Knockdown

qPCR analysis of expression of STAT1, STAT2, and IFNAR1 in response to siRNA transfection with the corresponding siRNA transcripts. The relative fold change of IL-27 treated cells was compared to their non-IL-27-treated controls within both nonsense KD and target KD treated groups.  $n = 3$  biological replicates. To test for statistical significance, a two-tailed Student's unpaired t test was performed using GraphPad Prism software. Data are mean  $\pm$  SEM. \* $p < 0.05$ , \*\* $p < 0.01$ , \*\*\* $p < 0.001$ .



**Supplementary Figure 3. IL-27 Signaling Results in Rapid and Transient Nuclear Translocation of STAT1, but not STAT2, and Sanger Sequences for STAT1, STAT2, and TYK2 CRISPR-Cas9 KO Keratinocytes**

(A) Immunofluorescence staining for p-STAT1 (Cy3) in primary human keratinocytes treated with a time course of 100 ng/mL of IL-27 or 50 U/mL of IFN- $\alpha$ . n = 3 biological replicates.

(B) Immunofluorescence staining for p-STAT2 (Cy3) in primary human keratinocytes treated with a time course of 100 ng/mL of IL-27 or 50 U/mL of IFN- $\alpha$ . n = 3 biological replicates.

(C) Sanger sequence of *STAT1*, *STAT2*, and *TYK2* KO CRISPR-Cas9 KO keratinocytes.

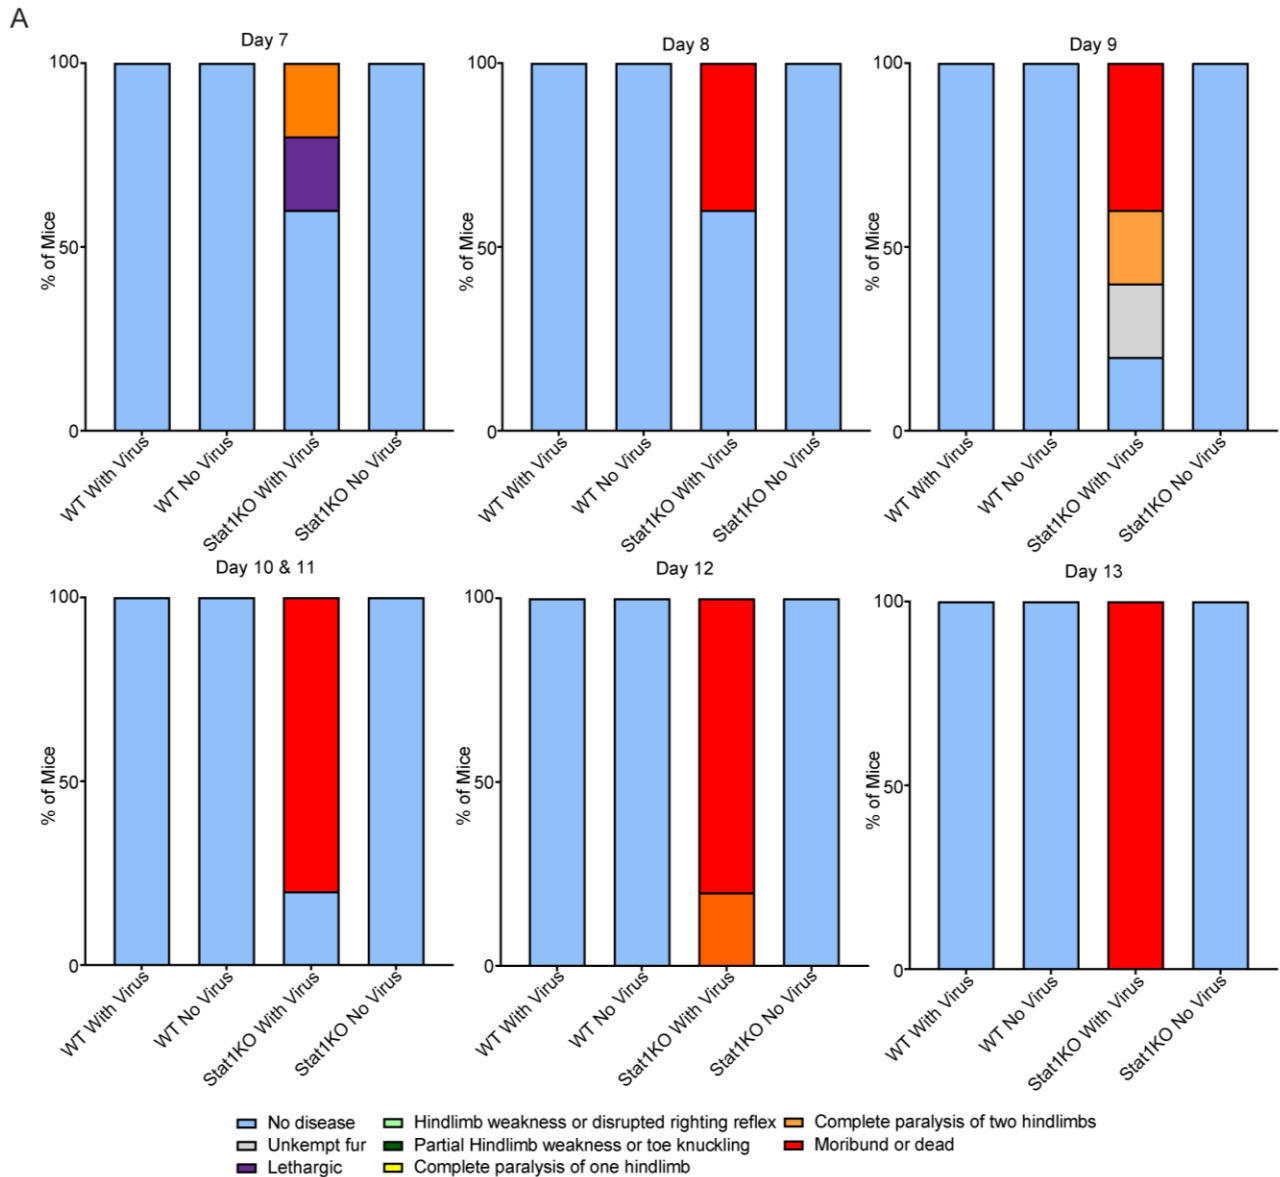

Supplementary Figure 4

**Supplementary Figure 4. *Stat1* Signaling is Required for Antiviral Defense Against Zika Virus**

(A) Bar graphs detailing morbidity and mortality of 129S6 (WT), and *Stat1*KO mice injected  $10^4$  Zika virus (HPF2013 strain) at 5-10 days post-infection. Symptoms were scored in a sequential fashion, where lesser symptoms (e.g. hunched, unkempt fur) were not counted if a mouse presented with more severe symptoms (e.g. hindleg

weakness). n = 4 mice (129S6) and 5 mice (*Stat1*KO) per experimental group.

Experiments was repeated 3 times.



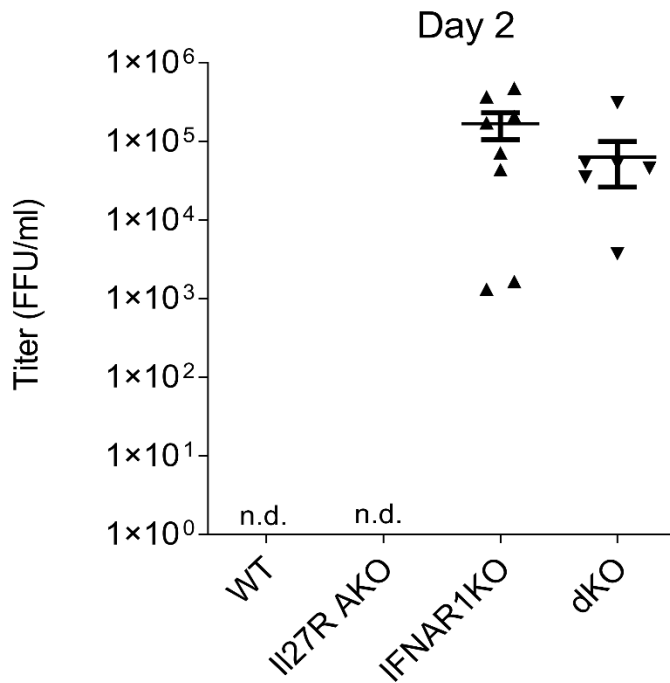

Supplementary Figure 5.

**Supplementary Figure 5.** Focus forming assay of sera from Zika virus-infected mice 2 days post-infection. Titers were calculated as FFU/mL and graphed as percent of Ctrl (Control: No cytokine treatment). To test for statistical significance, a two-tailed Student's unpaired t test was performed using GraphPad Prism software and no statistical significance between Ifnar1KO and dKO was observed.

## SUPPLEMENTARY Materials

**KEY RESOURCES TABLE S1**

| REAGENT or RESOURCE                                            | SOURCE                             | IDENTIFIER                    |
|----------------------------------------------------------------|------------------------------------|-------------------------------|
| Antibodies                                                     |                                    |                               |
| Rabbit polyclonal anti-OAS2                                    | Proteintech                        | Cat #: 19279-1-AP             |
| Rabbit polyclonal anti-MX1                                     | Abcam                              | Cat # AB 95926                |
| Rabbit polyclonal pSTAT1                                       | Cell Signaling Technologies        | Cat #: 9167S                  |
| Rabbit polyclonal pSTAT2                                       | Cell Signaling Technologies        | Cat #: 88410S                 |
| Rabbit polyclonal anti-IRF3                                    | Cell Signaling Technologies        | Cat #: 11904T                 |
| Virus Strains                                                  |                                    |                               |
| ZIKV-Dakar (DAK; Zika virus/A.africanus-tc/SEN/1984/41525-DAK) | University of Texas Medical Branch | GenBank accession #KU955591   |
| ZIKV-French Polynesia (PF; Zika virus strain H/PF/2013)        | University of Texas Medical Branch | GenBank accession #KJ776791.2 |
| Chemicals, Peptides, and Recombinant Proteins                  |                                    |                               |
| Human IL-6                                                     | Biologend                          | Cat #: 570802                 |
| Human IL-12 p70                                                | Tonbo                              | Cat #: 21-8129-U010           |
| Human IL-23                                                    | Biologend                          | Cat #: 574102                 |
| Human IL-27                                                    | Biologend                          | Cat #: 589204                 |
| Human IL-35                                                    | Biologend                          | Cat #: 578502                 |
| Human IFN- $\alpha$ 2                                          | Biologend                          | Cat #: 592704                 |
| Human IFN- $\gamma$                                            | Peprtech                           | Cat #: AF-300-02              |
| Mouse IL-27                                                    | Biologend                          | Cat #: 577406                 |
| Experimental Models: Cell Lines                                |                                    |                               |

|                                                                                           |               |                        |
|-------------------------------------------------------------------------------------------|---------------|------------------------|
| Human epidermal keratinocytes (adult)                                                     | Thermo Fisher | Cat #: C0055C          |
| Experimental Models: Organisms/Strains                                                    |               |                        |
| C57Bl6/J mice                                                                             | Jackson Labs  | Stock No: 000664       |
| Il27ra <sup>-/-</sup> mice                                                                | Jackson Labs  | Stock No: 018078       |
| Ifnar1 <sup>-/-</sup> mice                                                                | Jackson Labs  | Stock No: 32045-JAX    |
| BALB/c mice                                                                               | Jackson Labs  | Stock No: 000651       |
| Stat1 <sup>-/-</sup> mice                                                                 | Taconic       | Model No: 2045         |
| 129S6 mice                                                                                | Taconic       | Model No: 129SVE       |
| Ifnar1 <sup>-/-</sup> /Il27ra <sup>-/-</sup> double KO mice                               | Bred Locally  | Available upon request |
| Oligonucleotides                                                                          |               |                        |
| Human OAS1 Primer, Forward:<br>GTCTTCCTCAGTCCTCTCACG, Reverse:<br>AAGGCAGGCAGCACATCG      | This Paper    | N/A                    |
| Human OAS2 Primer, Forward:<br>TCAGAAGAGAAGCCAACGTGA, Reverse:<br>CGGAGACAGCGAGGGTAAAT    | This Paper    | N/A                    |
| Human OAS3 Primer, Forward:<br>ACTGACATCCCAGACGATGC, Reverse:<br>CCAGTGCTCACCTAGGGC       | This Paper    | N/A                    |
| Human OASL Primer, Forward:<br>CGTGAAACATCGGCCAACTAAG, Reverse:<br>GTACCCATTTCCCAGGCATAGA | This Paper    | N/A                    |
| Human MX1 Primer, Forward:<br>GGGGAGGAAATAGAGAAAATGAT, Reverse:<br>GTTTACAAAGGGCTTGCTTGCT | This Paper    | N/A                    |
| Mouse Oas1a Primer, Forward:<br>GGAGGCGGTTGGCTGAAGAGG, Reverse:<br>GAACCACCGTCGGCACATCC   | This Paper    | N/A                    |
| Mouse, Oas2 Primer, Forward:<br>CCGGGCCAGTGCACAAGTTAG, Reverse:<br>CGATGGCACCGAGGACACC    | This Paper    | N/A                    |

|                                                                                                     |                |     |
|-----------------------------------------------------------------------------------------------------|----------------|-----|
| Mouse, Oas3 Primer, Forward:<br>TCTGGGGTCGCTAAACATCAC, Reverse:<br>GATGACGAGTTTCGACATCGGT           | This Paper     | N/A |
| Mouse Oasl1 Primer, Forward:<br>CCAGGAAGAAGCCAAGCACCATC, Reverse:<br>AGGTTACTGAGCCCAAGGTCCATC       | This Paper     | N/A |
| Mouse Oasl2 Primer, Forward:<br>TTGTGCGGAGGATCAGGTACT, Reverse:<br>TGATGGTGTCGCAGTCTTTGA            | This Paper     | N/A |
| See Table S1 for mouse Oasl2 primer, human STAT1<br>primer, human STAT2 primer, human IFNAR1 primer | This Paper     | N/A |
| Software and Algorithms                                                                             |                |     |
| Human Affymetrix microarray data                                                                    | GSE143228      | N/A |
| Other code available upon request                                                                   | David Corcoran | N/A |
